# Supplementary material for: Wrinkle formation in a polymeric drug coating deposited via initiated chemical vapor deposition
Source: Royal Society of Chemistry journal article supplement (doi:10.1039/c6sm01919f), 2016-01-01
Supplement: c6sm01919f1.pdf [file c6sm01919f1.pdf]

## SUPPORTING INFORMATION

# Wrinkle Formation in a Polymeric Drug Coating deposited via initiated Chemical Vapor Deposition

*Paul Christian,<sup>1</sup> Heike M.A. Ehmman,<sup>2,3</sup> Oliver Werzer<sup>2,3</sup> and Anna Maria Coclite<sup>1,3,\*</sup>*

<sup>1</sup> Institute of Solid State Physics, Graz University of Technology, 8010 Graz, Austria

<sup>2</sup> Institute of Pharmaceutical Sciences, Department of Pharmaceutical Technology, University of Graz, 8010 Graz, Austria

<sup>3</sup> BioTechMed – Graz, Austria

\*E-mail: [anna.coclite@tugraz.at](mailto:anna.coclite@tugraz.at)

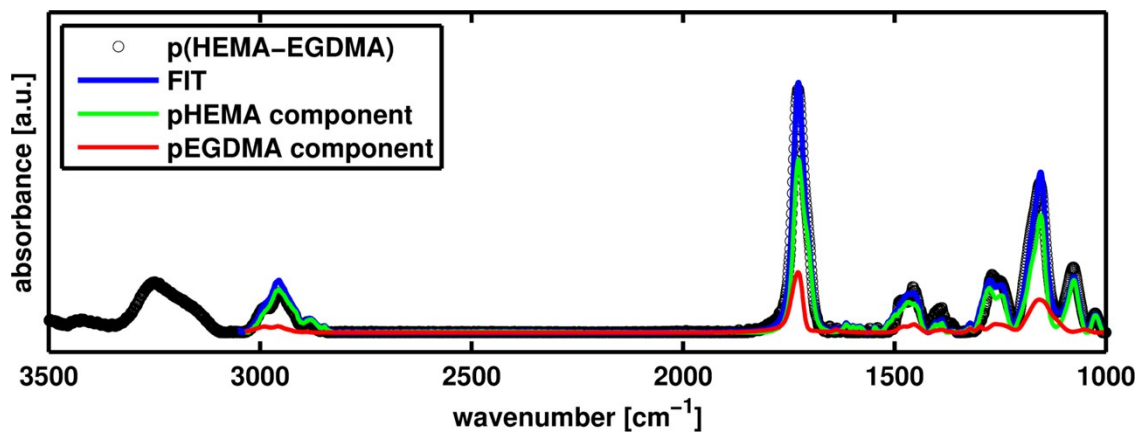

**Figure S1.** FT-IR spectrum of the crosslinked pHEMA layer obtained by iCVD. The experimental data are fitted as a combination of the single component FT-IR spectra. From this, the pHEMA fraction is determined to 85 %.

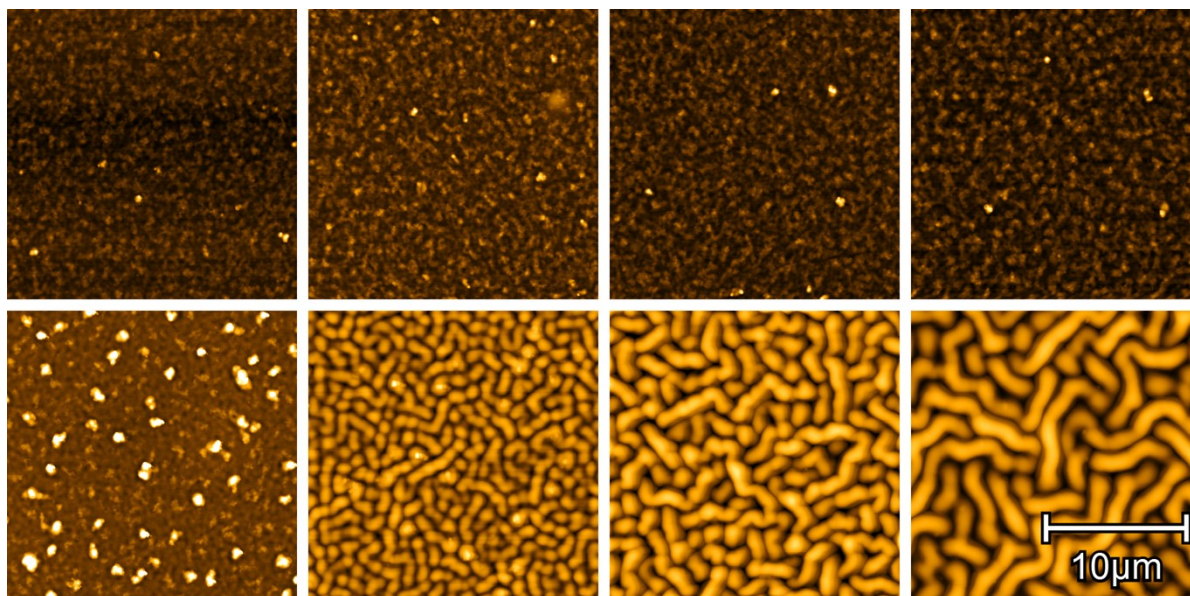

**Figure S2:** AFM height images of pHEMA films (200nm) coated by iCVD onto amorphous clotrimazole layers of various thickness. Starting on top left and going right, the thicknesses are: 19, 31, 45, 63, 86, 114, 189, 249 nm.

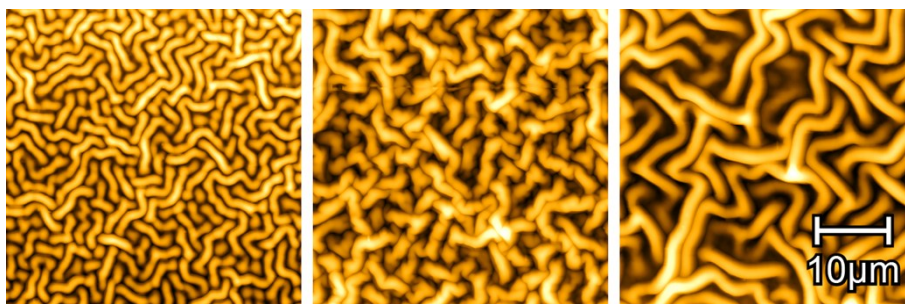

**Figure S3:** AFM height images of iCVD coated amorphous clotrimazole layers of various thickness. Starting from left: 249, 365, 531 nm. (The sample 249 nm is the same as above, but on a different scale for sake of comparability).
